# Supplementary material for: How do women trade-off benefits and risks in chemotherapy treatment decisions based on gene expression profiling for early-stage breast cancer? A discrete choice experiment
Source: PubMed Central journal article supplement — BMJ Open. 2016 Jun 2;6(6):e010981. doi: 10.1136/bmjopen-2015-010981 (PMC4893875; doi:10.1136/bmjopen-2015-010981), 2016-06-02
Supplement: bmjopen-2015-010981supp_table.pdf [file bmjopen-2015-010981supp_table.pdf]

**Online Appendix Table 1.** Tests for differences in part-worth utilities for covariates using Brown Forsythe F for multi-level covariates and t-value for bi-level covariates for the n=1004 respondents.

| Attributes and levels                                         | Mean part-worth utility | Know someone who has/had breast cancer | Relative who has/had breast cancer | Province of residence | Income           | Age     | Employment       | Marital status | Children living in household | Language |
|---------------------------------------------------------------|-------------------------|----------------------------------------|------------------------------------|-----------------------|------------------|---------|------------------|----------------|------------------------------|----------|
|                                                               |                         | Brown Forsythe F                       | t-value                            | Brown Forsythe F      | Brown Forsythe F | t-value | Brown Forsythe F | t-value        | t-value                      | t-value  |
| <i>MD's clinical risk estimate</i>                            |                         |                                        |                                    |                       |                  |         |                  |                |                              |          |
| Low risk                                                      | -29.81                  | 2.24                                   | -1.39                              | 0.70                  | 9.43***          | -0.51   | 1.89             | -0.87          | 0.93                         | -0.16    |
| Intermediate risk                                             | 0.20                    | 0.12                                   | 0.49                               | 1.15                  | 2.57             | -1.42   | 0.53             | 0.88           | -0.77                        | 1.32     |
| High risk                                                     | 29.61                   | 2.59                                   | 1.26                               | 1.18                  | 10.36***         | 1.04    | 1.63             | 0.57           | -0.70                        | -0.20    |
| <i>Trust in MD</i>                                            |                         |                                        |                                    |                       |                  |         |                  |                |                              |          |
| Don't trust                                                   | -25.54                  | 0.56                                   | 0.08                               | 1.41                  | 0.17             | 0.60    | 0.98             | 0.92           | -2.15*                       | 1.00     |
| Somewhat trust                                                | -0.73                   | 0.14                                   | 0.64                               | 0.25                  | 0.36             | -1.51   | 1.46             | -0.74          | 2.58**                       | 0.13     |
| Totally trust                                                 | 26.27                   | 1.12                                   | -0.55                              | 1.41                  | 0.01             | 0.46    | 0.40             | -0.47          | 0.49                         | -1.28    |
| <i>Likelihood of temporary SE</i>                             |                         |                                        |                                    |                       |                  |         |                  |                |                              |          |
| Low likelihood                                                | 2.47                    | 1.10                                   | -1.28                              | 1.00                  | 1.94             | 0.11    | 0.45             | 0.66           | -1.85                        | 0.19     |
| Moderate likelihood                                           | 7.55                    | 5.41**                                 | -0.34                              | 1.00                  | 2.18             | 1.29    | 0.90             | 0.94           | -0.84                        | -0.29    |
| High likelihood                                               | -10.02                  | 4.10*                                  | 1.55                               | 0.84                  | 6.12***          | -1.15   | 0.54             | -1.43          | 2.64**                       | 0.09     |
| <i>Likelihood of permanent SE</i>                             |                         |                                        |                                    |                       |                  |         |                  |                |                              |          |
| Low likelihood                                                | 33.75                   | 0.33                                   | -0.15                              | 0.60                  | 1.14             | 0.35    | 1.79             | -0.66          | -1.15                        | -0.65    |
| Moderate likelihood                                           | 12.25                   | 2.31                                   | 0.55                               | 0.14                  | 1.23             | 0.49    | 0.19             | 0.96           | -1.30                        | 0.25     |
| High likelihood                                               | -46.00                  | 2.12                                   | -0.18                              | 0.56                  | 1.39             | -0.62   | 1.49             | 0.01           | 1.85                         | 0.53     |
| <i>GEP score, likely benefit from chemotherapy</i>            |                         |                                        |                                    |                       |                  |         |                  |                |                              |          |
| GEP not available                                             | -17.34                  | 0.54                                   | 0.12                               | 0.37                  | 1.50             | -0.32   | 0.63             | 0.09           | 0.59                         | -0.60    |
| 9, low benefit                                                | -43.39                  | 3.27*                                  | -3.53**                            | 0.93                  | 3.74             | 1.54    | 0.82             | -2.28*         | -0.67                        | -1.33    |
| 22, uncertain benefit                                         | -6.83                   | 0.46                                   | -0.35                              | 0.93                  | 1.56             | -0.99   | 1.73             | 0.18           | 0.68                         | 1.18     |
| 44, high benefit                                              | 67.56                   | 3.04                                   | 2.95**                             | 1.09                  | 1.33             | -0.48   | 1.73             | 1.63           | -0.17                        |          |
| <i>General preference for chemotherapy vs no chemotherapy</i> |                         |                                        |                                    |                       |                  |         |                  |                |                              |          |

-49.53      5.41\*\*      0.23      1.58      1.75      1.05      1.25      2.00\*      -3.27\*\*      1.83

---

Note: Know someone who has/had breast cancer (yes, no, unsure); relative who has/had breast cancer (yes, no); province of residence (Alberta, Atlantic, British Columbia, Central, Ontario, Quebec); income (<\$40,000, \$40,000 to \$80,000, >\$80,000, prefer not to answer); age (<50, ≥50); employment (employed, self-employed, retired, unemployed, other); marital status (married, not married); children living in household (yes, no), language (English, French)

\*\*\* Significant < 0.001; \*\* significant < 0.01; \* significant < 0.05
